# Supplementary material for: Subgenome Discrimination in Brassica and Raphanus Allopolyploids Using Microsatellites
Source: MDPI journal article supplement (doi:10.3390/cells10092358), 2021-09-08
Supplement: s1 [file s1]

## Supplementary Materials

**Table S1.** Summary of PLOPs used for FISH with their corresponding length (base), fluorochrome, and notes on the detection of FISH signals in the corresponding genomes.

| New Name    | PLOP                          | Length | Fluorochrome | Note <sup>a</sup> |
|-------------|-------------------------------|--------|--------------|-------------------|
| ACBR_msat01 | AGAGAGAGAGAGAGAGAGAGAG        | 22     | Cy3-5'       | B/R <sup>b</sup>  |
| ACBR_msat02 | ATATATATATATATATATATAT        | 22     | TxR-5'       | C/R               |
| ACBR_msat03 | AAGAAGAAGAAGAAGAAGAAG         | 21     | FAM-5'       | A/C/B             |
| ACBR_msat04 | GATGATGATGATGATGATGAT         | 21     | Cy5-5'       | ND <sup>b</sup>   |
| ACBR_msat05 | ATTATTATTATTATTATTATT         | 21     | FAM-5'       | ND                |
| ACBR_msat06 | TTTAGGGTTTAGGGTTTAGGGTTAGGG   | 28     | Coumarine-5' | A/C/B/R           |
| ACBR_msat07 | AACAACAACAACAACAACAAC         | 21     | FAM-5'       | ND                |
| ACBR_msat08 | GTGTGTGTGTGTGTGTGTGTGT        | 22     | Cy3-5'       | A/C/B/R           |
| ACBR_msat09 | CCTCCTCCTCCTCCTCCTCCT         | 21     | Cy3-5'       | A/C/B/R           |
| ACBR_msat10 | AAATAAATAAATAAATAAAT          | 20     | FAM-5'       | ND                |
| ACBR_msat11 | ACCACCACCACCACCACCACC         | 21     | Cy3-5'       | A/C/B/R           |
| ACBR_msat12 | AAAGAAAGAAAGAAAGAAAGAAAG      | 24     | FAM-5'       | ND                |
| ACBR_msat13 | CAGCAGCAGCAGCAGCAGCAG         | 21     | TxR-5'       | A/C/B/R           |
| ACBR_msat14 | TTTAGGGTTAGGTAGGGTTTAGGGTTA   | 27     | Cy5-5'       | A                 |
| ACBR_msat15 | ACAAACAAACAAACAAACAAACAA      | 24     | TxR-5'       | ND                |
| ACBR_msat16 | TTCGGTTCGGTTCGGTTCGGTTCGG     | 25     | TxR-5'       | ND                |
| ACBR_msat17 | TAGTAGTAGTAGTAGTAGTAG         | 21     | FAM-5'       | ND                |
| ACBR_msat18 | ATAGATAGATAGATAGATAGATAGATA   | 27     | Cy5-5'       | ND                |
| ACBR_msat19 | TATTTTATTTTATTTTATTTTATTT     | 25     | TxR-5'       | C/R               |
| ACBR_msat20 | GGGTTTCGGGTTTCGGGTTTCGGGTTT   | 27     | Cy5-5'       | C                 |
| ACBR_msat21 | AATTAATTAATTAATTAATTAATT      | 24     | TxR-5'       | ND                |
| ACBR_msat22 | ACTGTTTCATCGAGATACTGTTTCATCGA | 27     | FAM-5'       | ND                |

<sup>a</sup> A, C, B, and R represent the clustered FISH signals detected in the corresponding genomes. Most FISH signals were non-clustered. <sup>b</sup> Showed signal in one homologous chromosome in the A genome. <sup>c</sup> ND: non-detected

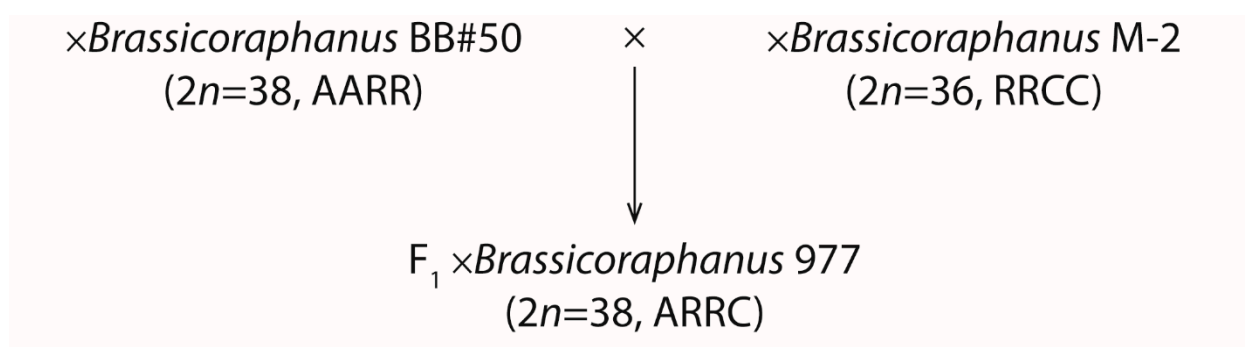

**Figure S1.** The hybrid  $\times$ *Brassicoraphanus* 977 that possible carries chromosomes blocks form A, C, and R genomes was developed from crosses of synthetic allotetraploids.

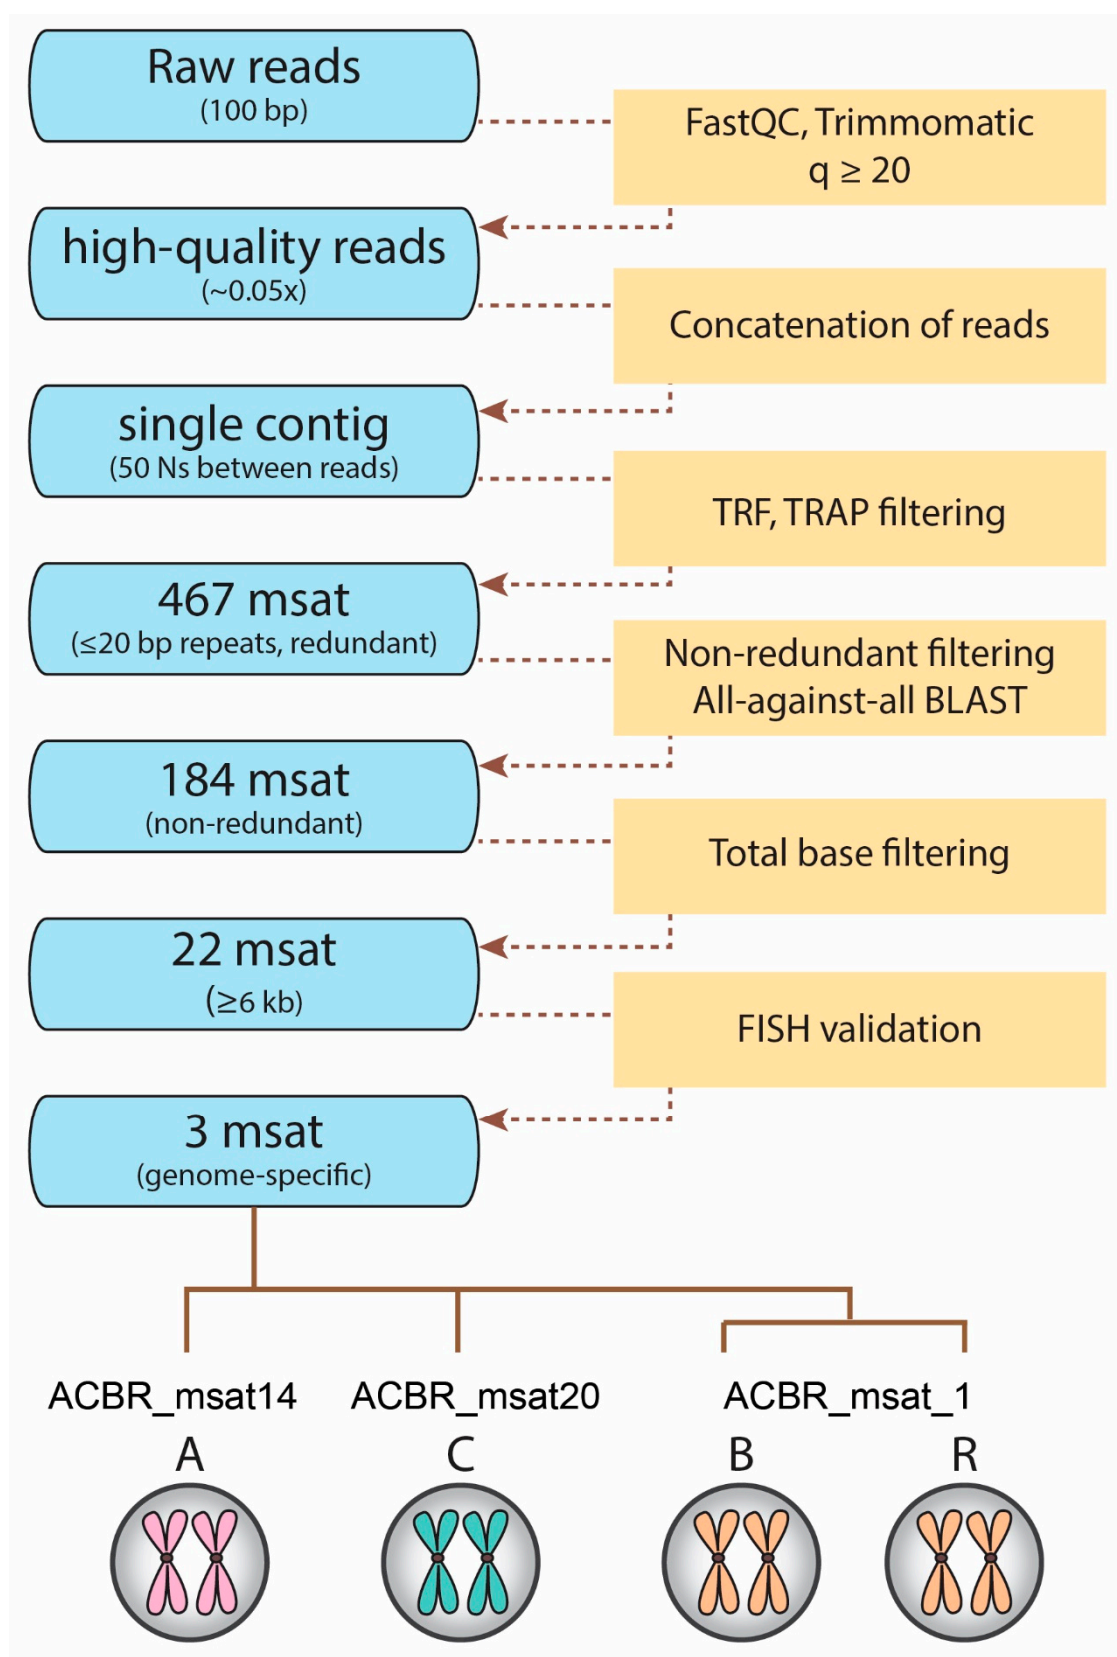

**Figure S2.** Summary of the microsatellite mining and FISH validation pipeline.

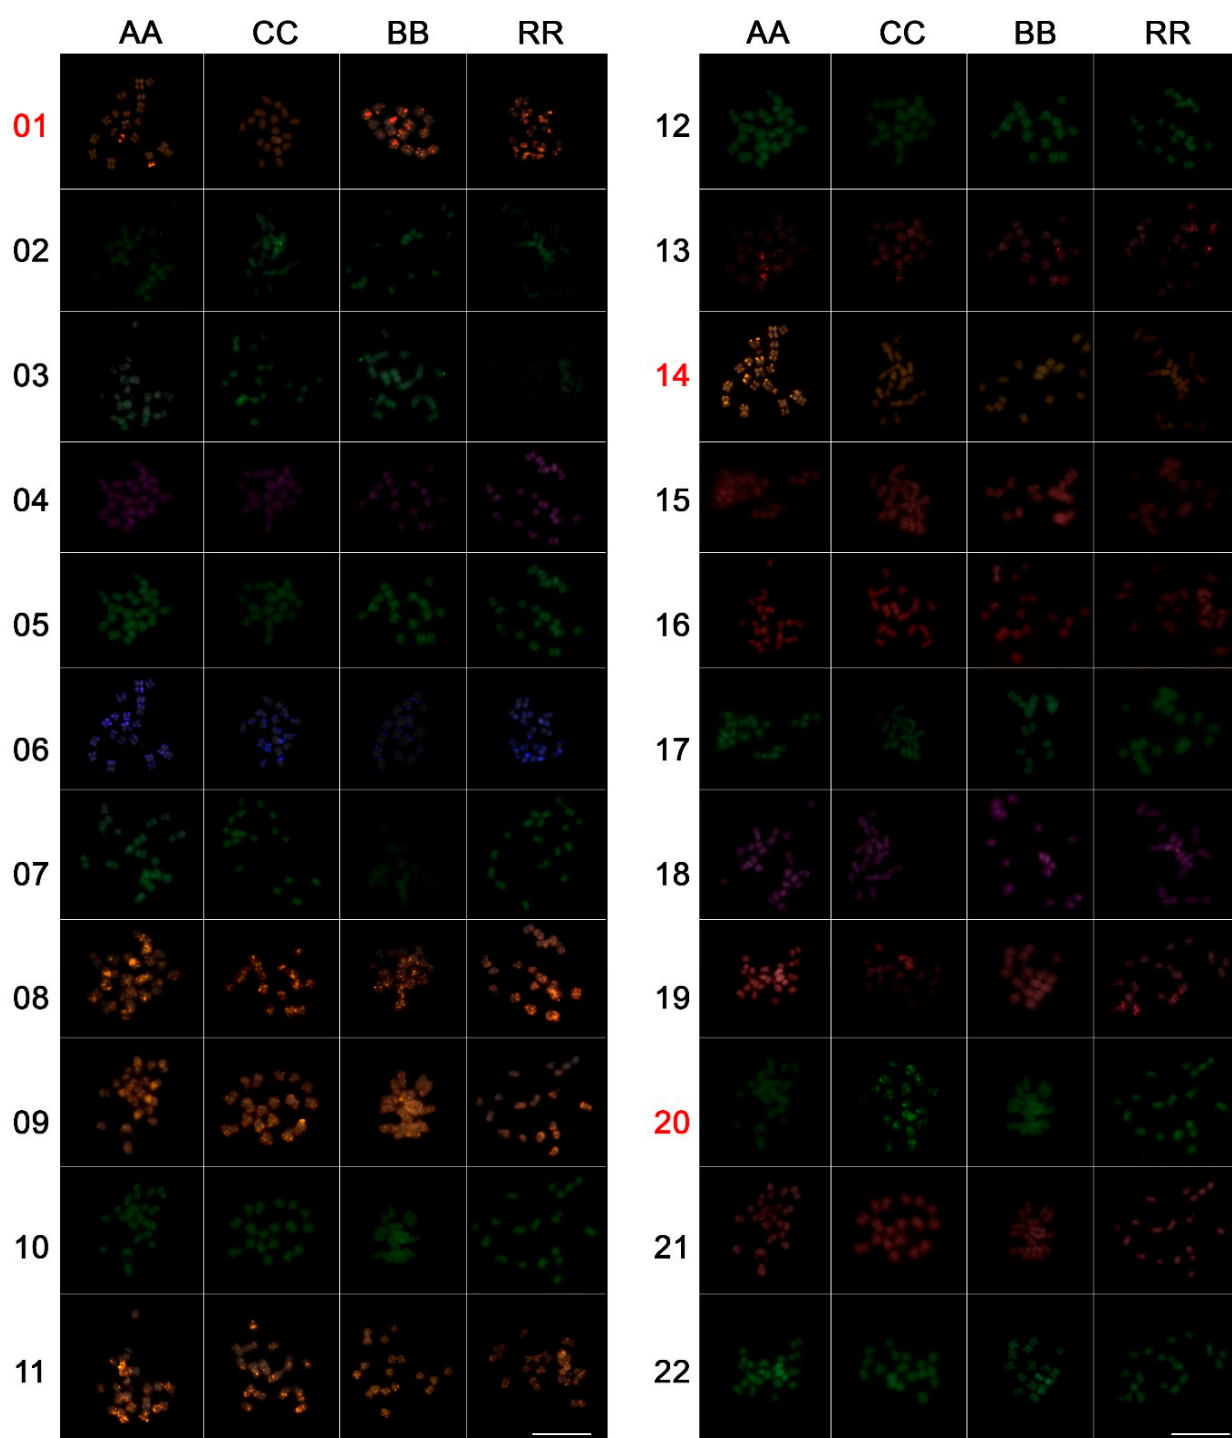

**Figure S3.** FISH screening of the 22 candidate microsatellites in the diploid *B. rapa* (AA), *B. oleracea* (CC), *B. nigra* (BB), and *R. sativus* (RR) genomes. While most FISH signals showed non-clustered loci, some showed clustered signals. The three microsatellite probes that were specific to the A, C, and B genomes in the U's triangle are highlighted red. Numbers correspond to the list of microsatellites in Table 3.

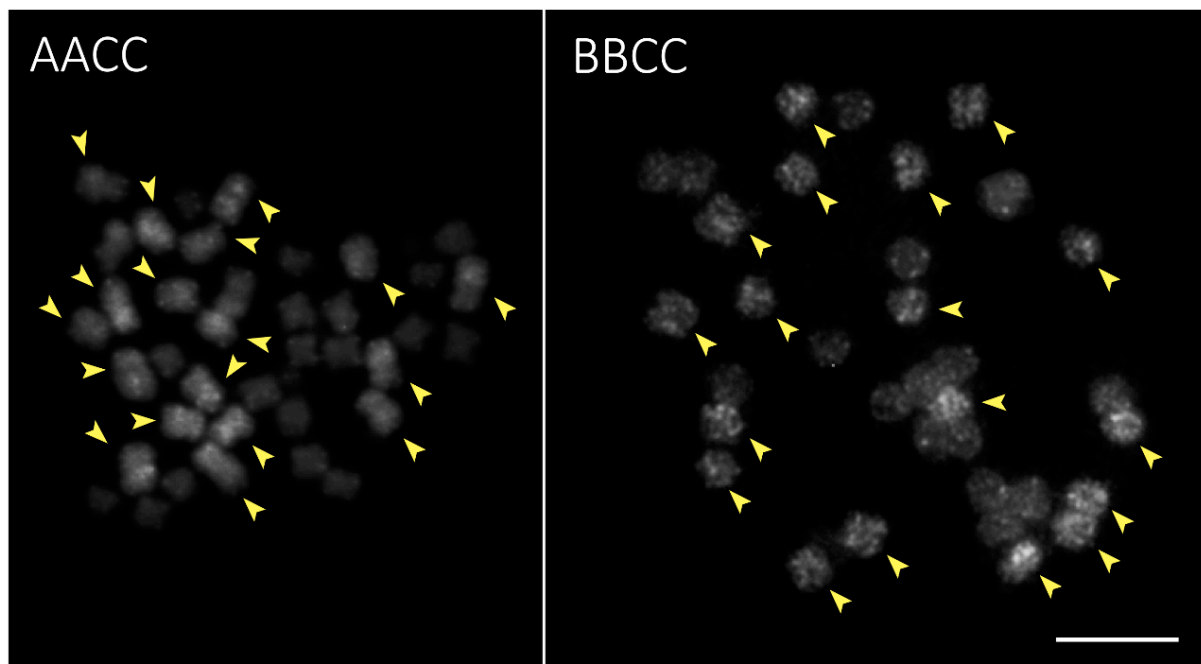

**Figure S4.** Chromosomal distribution of *Arabidopsis*-type telomere repeats (ACBR\_msat06) showing more intense FISH signals in 18 C genome chromosomes (yellow arrowheads) in *B. napus* (AACC) and *B. carinata* (BBCC). This result shows the practicality of telomere repeat in discriminating C-genome chromosomes within allopolyploids with C- genome component. Scale bar = 10  $\mu$ m.
